# Supplementary material for: Exercise enhances skeletal muscle regeneration by promoting senescence in fibro-adipogenic progenitors
Source: PubMed Central journal article supplement (PMC7021787; doi:10.1038/s41467-020-14734-x), 2020-02-14
Supplement: 41467_2020_14734_MOESM1_ESM.pdf [file 41467_2020_14734_MOESM1_ESM.pdf]

Supplementary Information for

**Exercise enhances skeletal muscle regeneration by promoting senescence  
in fibro-adipogenic progenitors**

**Saito *et al.***

# Supplementary Figure 1

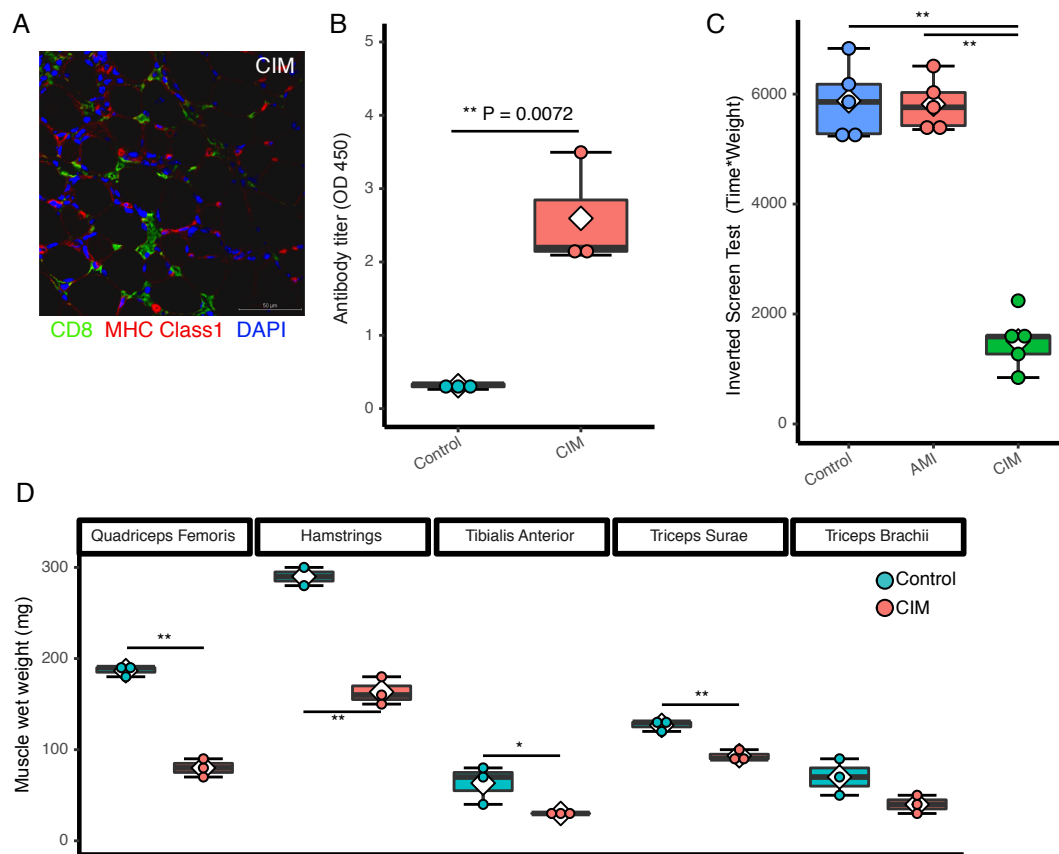

**Supplementary Figure 1. Characteristics of CIM model mice.** (A) Representative images of CD8- and MHC class 1-immunostained triceps surae. (B) Serum antibody titer to crude-myosin in CIM and control mice. (C-D) Results of the inverted screen test for assessment of limb grip strength test (C), and muscle wet weight at 14 days after first immunization(D). Quantitative data are shown as means as well as medians with IQRs and 1.5 times the IQR, and are displayed by dot plots and box and whisker plots. *P*-values were determined by the two-tailed Student's t-test or one-way ANOVA adjusted by the Holm method (\**P* < 0.05, \*\**P* < 0.001).

# Supplementary Figure 2

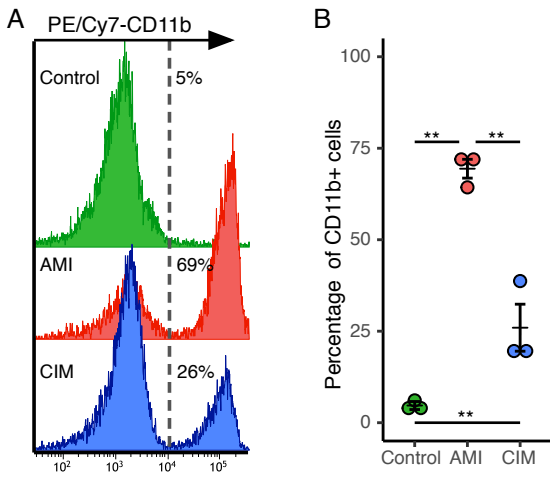

**Supplementary Figure 2. Flow cytometric analysis of CD11b in mononuclear cells in muscle. (A)**

Representative CD11b histograms from n = 3 replicates, and (B) quantification of percentages of CD11b+ cells.

# Supplementary Figure 3

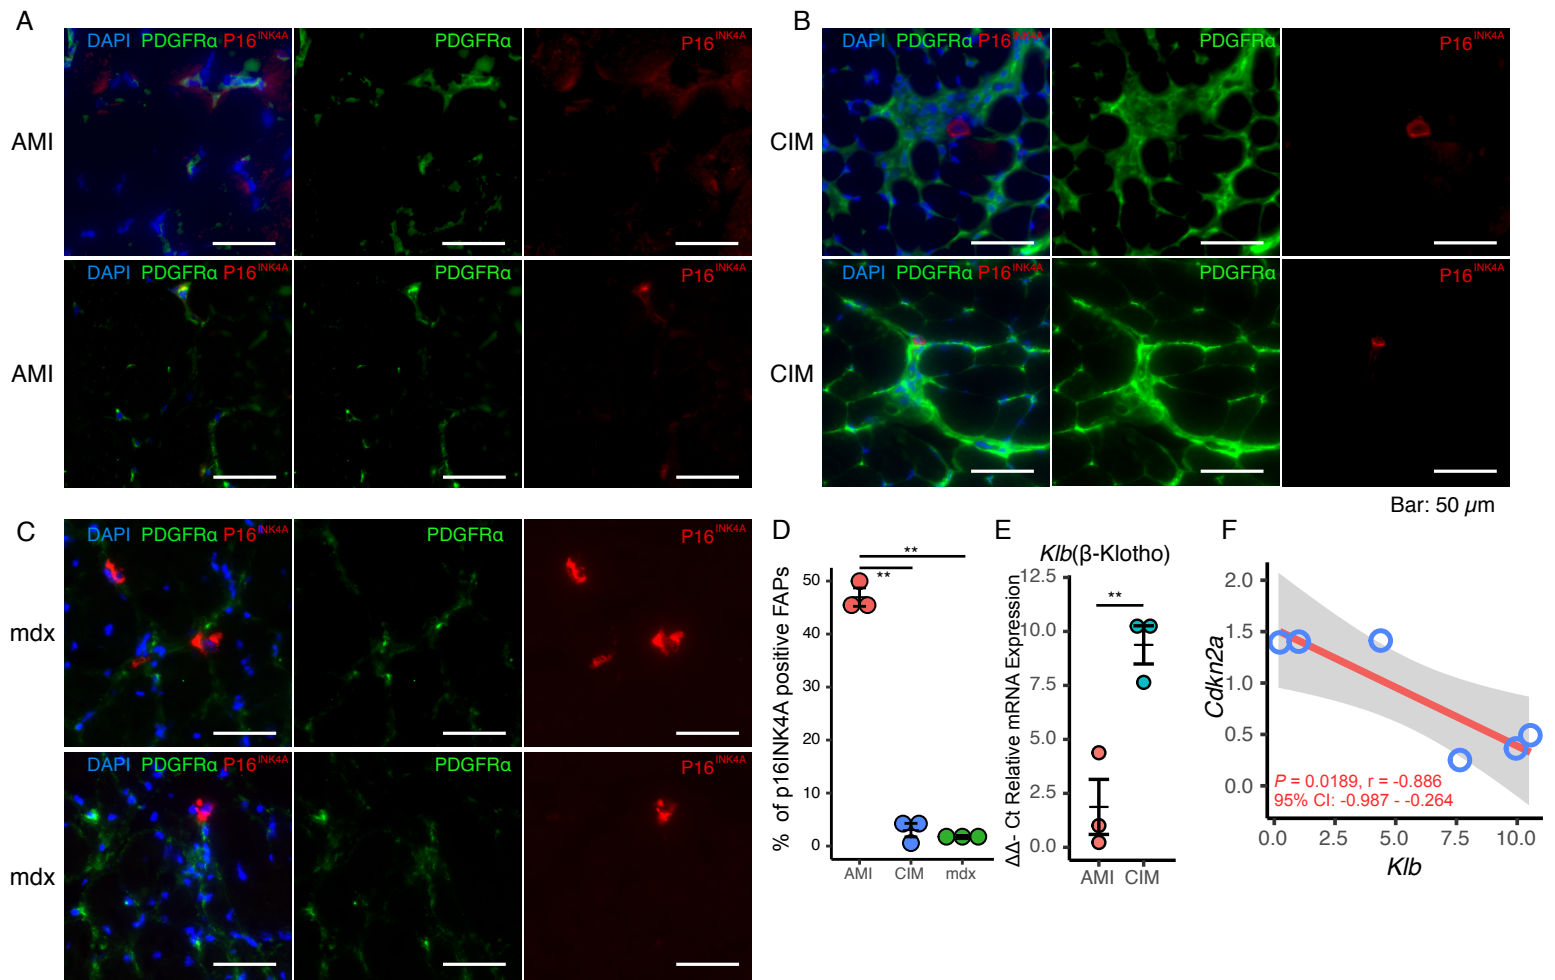

**Supplementary Figure 3. Immunohistochemical analysis of p16INK4A expression in AMI, CIM, and mdx mice.**

(A-D) Representative images of PDGFR $\alpha$ - and p16INK4A-immunostained muscle (green and red, respectively) in AMI, CIM, and mdx mice (A-C), and quantitative data of the percentages of p16INK4A+ FAPs (D) in randomly chosen fields of view. (E and F) mRNA expression of *Klb* in FAPs isolated from AMI and CIM mice (n = 3 per group) (E), and correlation of *Klb* mRNA expression with *Cdkn2a* mRNA expression in FAPs isolated from AMI and CIM mice (F). Quantitative data are shown as means  $\pm$  SEM (dot plot). *P*-values were determined by two-tailed Student's *t*-test (\**P* < 0.05, \*\**P* < 0.001).

# Supplementary Figure 4

A

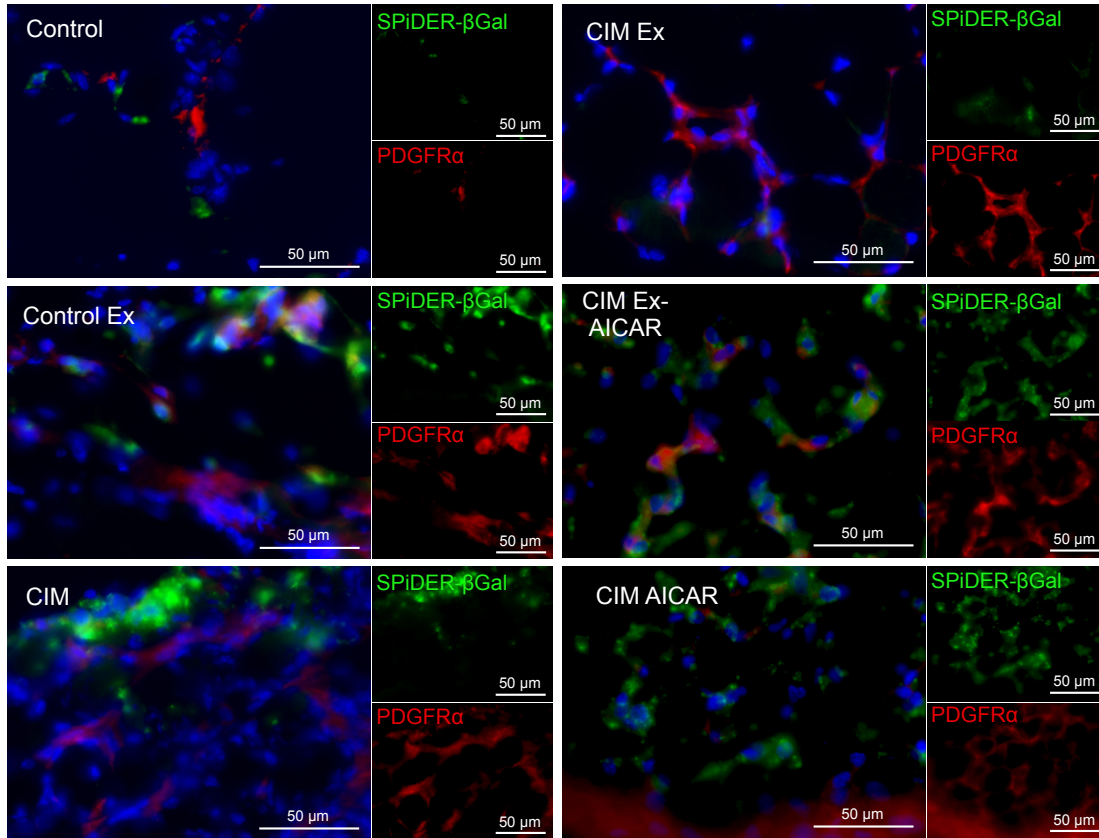

B

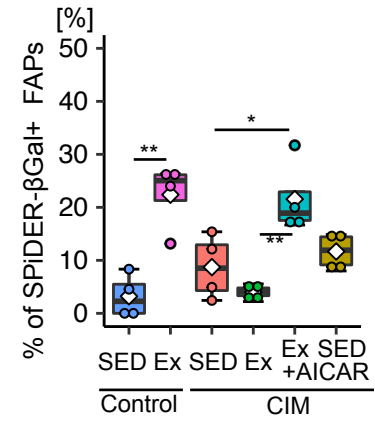

**Supplementary Figure 4. SPiDER-βGal expression in PDGFRα-positive FAPs in exercised muscle.**

(A and B) Representative images of SPiDER-βGal- and PDGFRα-immunostained muscle in control and CIM mice with or without exercise and AICAR treatment (A), and quantitative data of the SPiDER-βGal-positive FAPs(B).

# Supplementary Figure 5

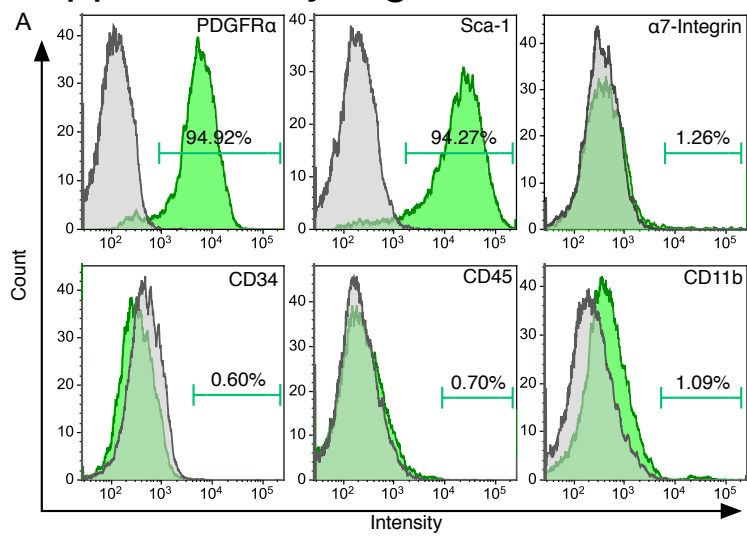

**Supplementary Figure 5. Flow cytometric analysis of magnetic isolated Lin-, CD31-,  $\alpha$ 7-integrin-cultured cell.** (A) Expressions of cell surface antigens PDGFR $\alpha$ , Sca-1,  $\alpha$ 7-integrin, CD34, CD45, and CD11b. Positive gates were set by analyzing negative control sample stained with isotype control or 2nd antibody only (gray area). The percentage of each cell population are shown in the panels.

# Supplementary Figure 6

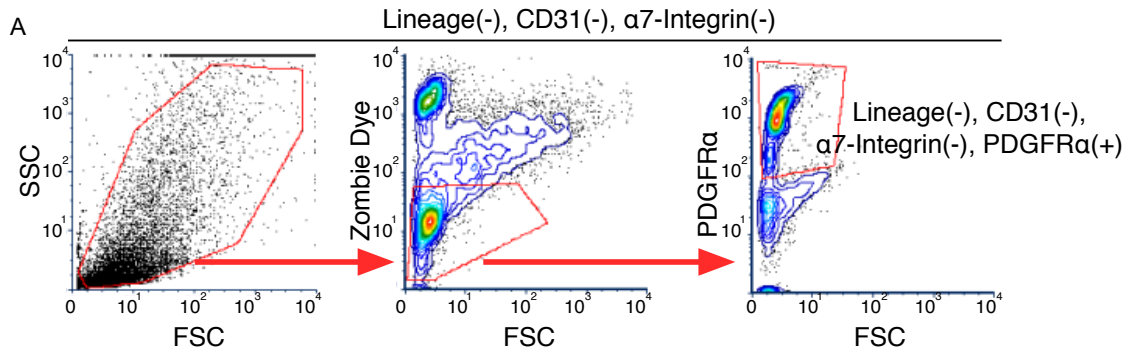

**Supplementary Figure 6. Gating strategies used in flow cytometric analysis.** (A) Magnetically isolated Lin-, CD31-,  $\alpha$ 7-integrin- cells were used. Zombie dye positive cells are gated out as dead cells. Zombie dye-, PDGFR $\alpha$ + cells were used as FAPs.

Supplementary table 1

Primary antibodies used

| Antibody                                           | Clone                                                                                                 | Conjugate(s)    | Dulution | Source                       | Cat. No.       |
|----------------------------------------------------|-------------------------------------------------------------------------------------------------------|-----------------|----------|------------------------------|----------------|
| <b>Magnetic cell sorting and Flow cytometry</b>    |                                                                                                       |                 |          |                              |                |
| rabbit anti-PDGFR $\alpha$                         | polyclonal                                                                                            | unconjugated    | 1:200    | Santa Cruze<br>Biotechnology | SC-338         |
| rat anti-CD31                                      | MEC13.1                                                                                               | biotin          | 1:200    | Biolegend                    | 102503         |
| rat anti-integrin $\alpha$ 7                       | 3C12                                                                                                  | biotin          | 1:20     | Miltenyi Biotec              | 130-102-125    |
| Lineage cell detection<br>cocktail                 | rat anti-CD5<br>rat anti-CD11b<br>rat anti-CD45R<br>rat anti-7-4<br>rat anti-Gr-1<br>rat anti-Ter-119 | biotin          | 1:10     | Miltenyi Biotec              | 130-092-613    |
| rat anti-CD140a                                    | APA5                                                                                                  | biotin, PE      | 1:200    | Biolegend                    | 135909, 135905 |
| rabbit anti-p16INK4A                               | Polyclonal                                                                                            | unconjugated    | 1:200    | ProteinTech                  | 10883-1-AP     |
| mouse anti-p53                                     | 1C12                                                                                                  | Alexa Fluor 647 | 1:50     | Cell Signaling               | 2533S          |
| mouse anti-Bcl2                                    | BCL/10C4                                                                                              | Alexa Fluor 488 | 1:80     | Biolegend                    | 633505         |
| rat anti-IL-33                                     | 396118                                                                                                | Alexa Fluor 488 | 1:50     | Novus Biologicals            | IC3626G        |
| mouse anti-phospho p38<br>MAPK(Thr180/Tyr182)      | 36/p38                                                                                                | PE/Cy7          | 1:5      | BD Biosciences               | 560241         |
| rabbit anti-phospho NF- $\kappa$ B<br>p65 (Ser536) | 93H1                                                                                                  | Alexa Fluor 647 | 1:50     | Cell Signaling               | 4887S          |
| rat anti-CD45                                      | 30-F11                                                                                                | FITC            | 1:200    | Biolegend                    | 103107         |
| rat anti-Sca-1                                     | D7                                                                                                    | PE/Cy7          | 1:200    | Biolegend                    | 108113         |
| rat anti-CD34                                      | RAM34                                                                                                 | Alexa Fluor 700 | 1:200    | eBioscience                  | 56-0341-82     |
| rat anti-CD11b                                     | M1/70                                                                                                 | PE/Cy7          | 1:80     | Biolegend                    | 101215         |
| <b>Immunohistochemistry and immunofluorescence</b> |                                                                                                       |                 |          |                              |                |
| rat anti-CD140a                                    | APA5                                                                                                  | unconjugated    | 1:50-200 | Biolegend                    | 135902         |
| rabbit anti-collagen type I                        | Polyclonal                                                                                            | unconjugated    | 1:100    | Abcam                        | ab34710        |
| rabbit anti-laminin                                | Polyclonal                                                                                            | unconjugated    | 1:100    | Abcam                        | ab11575        |
| rabbit anti-p16INK4A                               | Polyclonal                                                                                            | unconjugated    | 1:100    | ProteinTech                  | 10883-1-AP     |
| mouse anti-p53                                     | 1C12                                                                                                  | Alexa Fluor 647 | 1:50     | Cell Signaling               | 2533S          |
| mouse anti-Bcl2                                    | BCL/10C4                                                                                              | Alexa Fluor 488 | 1:50     | Biolegend                    | 633505         |
| rat anti-IL-33                                     | 396118                                                                                                | Alexa Fluor 488 | 1:50     | Novus Biologicals            | IC3626G        |
| rabbit anti-active caspase-3                       | Polyclonal                                                                                            | unconjugated    | 1:125    | Promega                      | G7481          |
| mouse anti-Myosin 4                                | MF20                                                                                                  | Alexa Fluor 488 | 1:100    | Invitrogen                   | 53-6503-82     |
| rat anti-CD8                                       | 53-6.7                                                                                                | unconjugated    | 1:80     | Biolegend                    | 100701         |
| mouse anti-H-2Kd                                   | SF1-1.1                                                                                               | biotin          | 1:80     | Biolegend                    | 116603         |

Secondary reagent used

| Secondary Reagent                  | Conjugate(s)                                | Source                   |
|------------------------------------|---------------------------------------------|--------------------------|
| goat polyclonal anti-rabbit<br>IgG | Alexa Fluor 488,<br>Alexa Fluor 647         | Jackson<br>ImmunoReserch |
| goat polyclonal anti-rat IgG       | Alexa Fluor 488,<br>Alexa Fluor 647,<br>Cy3 | Jackson<br>ImmunoReserch |
| Streptavidin                       | Alexa Fluor 647                             | Jackson<br>ImmunoReserch |



SupplementaryTable 2. Specific primer sequence used for real-time PCR

| Gene             | Forward                      | Reverse                       | Size | Accession Number |
|------------------|------------------------------|-------------------------------|------|------------------|
| <i>Cd274</i>     | 5' GGAATTGTCTCAGAATGGTC 3'   | 5' GTAGTTGCTTCTAGGAAGGAG 3'   | 102  | NM_021893.3      |
| <i>Pdcd1lg2</i>  | 5' AAGACTGACAATCTTCCCTC 3'   | 5' CCTGAAAGTCATTAGGAGCC 3'    | 122  | NM_021396.2      |
| <i>Cd47</i>      | 5' TGCGGTTTCAGCTCAACTACTG 3' | 5' GCTTTGCGCCTCCACATTAC 3'    | 108  | NM_010581.3      |
| <i>Cdkn2a</i>    | 5' CGAACTCTTTCGGTCGTACCC 3'  | 5' CGAATCTGCACCGTAGTTGAGC 3'  | 89   | NM_001040654.1   |
| <i>Trp53</i>     | 5' AGCATCTTATCCGGGTGGAAG 3'  | 5' CCCATGCAGGAGCTATTACACA 3'  | 157  | NM_011640.3      |
| <i>P21</i>       | 5' GTACTTCCTCTGCCCTGCTG 3'   | 5' AGAAGACCAATCTGCGCTTG 3'    | 183  | NM_007669.5      |
| <i>P19Arf</i>    | 5' CGGAATCCTGGACCAGGTG 3'    | 5' ACCAGCGTGTCCAGGAAGC 3'     | 150  | NM_009877.2      |
| <i>I133</i>      | 5' GGTGTGGATGGGAAGAAGCTG 3'  | 5' GAGGACTTTTTGTGAAGGACG 3'   | 155  | NM_001164724.2   |
| <i>Klb</i>       | 5' AGCCAATGGCATCGATGAC 3'    | 5' ACACGCAGGACTTCTGTTCT 3'    | 265  | NM_031180.2      |
| <i>Tnfrsf10b</i> | 5' ACATGCAAAGGAGTGTGGTG 3'   | 5' GTGAATTCGCTGACCGTACTTG 3'  | 133  | NM_009398.2      |
| <i>Tgfb1</i>     | 5' GCCTGAGTGGCTGTCTTTTGA 3'  | 5' CACAAGAGCAGTGAGCGCTGAA 3'  | 101  | NM_011577.2      |
| <i>Acta1</i>     | 5' ACGCTGAAGTATCCGA 3'       | 5' CTTTTCTCCCGTTGG 3'         | 162  | NM_007392.3      |
| <i>Fst</i>       | 5' AACCTACCGCAACGAATGTG 3'   | 5' TGGTCTGATCCACCACACAAG 3'   | 143  | NM_001301373.1   |
| <i>Gapdh</i>     | 5' AGGTCGGTGTGAACGGATTG 3'   | 5' TGTAGACCATGTAGTTGAGGTCA 3' | 123  | NM_001289726.1   |
| <i>18S rRNA</i>  | 5' GTAACCCGTTGAACCCATT 3'    | 5' CCATCCAATCGGTAGTAGCG 3'    | 151  | NR_003286        |

Supplementary Table 3. Primer sequence used for Trp53 mice genotyping

| Primer name   | Sequence               |
|---------------|------------------------|
| p53WTKO-Rv2   | ACACCCAACACCATACCATGT  |
| NP4           | TGCTCGACGTTGTCACTGAAGC |
| LCB614(int-1) | GTTATGCATCCATACAGTACA  |
